# Supplementary material for: Identification of Robust Immune‐Associated lncRNAs Signature for Immune Checkpoint Blockade and Prognosis in Pancreatic Ductal Adenocarcinoma
Source: Research Square preprint supplement (doi:10.21203/rs.3.rs-113463/v1), 2020-11-25
Supplement: Supplementary file 1 [file 4355783147cfcaacc29ec3ce.xlsx]

## Sheet: Sheet1
id	futime	fustat	LINC02257	AC006504.8	LINC01426	FLVCR1-DT	AC068282.1	riskScore	risk
TCGA-HV-A5A4	0.635616	0	0.26572	1.17693	1.76748	0.709061	0.277825	1.92244	high
TCGA-IB-AAUQ	0.50137	1	0.653982	2.69806	0.557581	0.764687	0.69756	0.303069	low
TCGA-HZ-A77Q	0.090411	0	0.429726	0.516468	1.01882	0.195688	0.271969	3.26695	high
TCGA-FB-A5VM	1.36438	1	0.386084	1.34842	1.84204	0.844072	0.557039	1.36498	high
TCGA-US-A776	3.33151	0	0	0.22501	0.272663	0.567357	0.478042	1.55391	high
TCGA-FB-AAPY	2.90137	1	0.178418	0.911335	1.47969	1.31646	0.868791	0.806217	low
TCGA-IB-7652	3.05753	0	0.26593	0.664921	1.37912	0.491277	0.739959	1.89121	high
TCGA-IB-7886	0.336986	1	0.387027	0.423146	0.391277	0.081417	0.349607	2.59416	high
TCGA-2J-AABR	1.2	0	0.143285	0.900775	0.648577	0.841165	0.138214	1.29592	high
TCGA-HV-A7OP	2.67945	0	0.0918864	2.02179	0.113952	0.859527	0.397719	0.368955	low
TCGA-3A-A9IR	4.22466	0	0	1.67692	0.0448542	6.16578	0.556877	0.00793181	low
TCGA-US-A77G	0.0328767	1	0.0857429	1.04438	1.17631	0.878116	3.41172	0.130571	low
TCGA-HZ-A8P0	0	0	0.579425	0.869263	0.832884	0.807065	0.996674	0.925919	low
TCGA-H8-A6C1	1.83836	0	0.36762	1.62498	2.86361	0.555841	0.571126	2.25581	high
TCGA-2L-AAQM	3.78904	0	0	4.29594	1.28304	1.25248	0.369624	0.100773	low
TCGA-3A-A9IO	5.32055	0	0	2.52361	0.0567141	1.59315	0.263928	0.158162	low
TCGA-IB-7888	3.64932	1	0	0.906735	1.70314	0.194186	0.474618	2.57365	high
TCGA-HV-A5A5	0.791781	0	0.505052	1.58753	0.806404	1.4336	0.562128	0.471305	low
TCGA-IB-8126	1.26575	0	0.104653	0.657912	0.659735	0.472595	0.420622	1.61761	high
TCGA-IB-AAUO	0.654795	1	0.578829	0.779759	1.1152	0.326737	0.421826	2.45263	high
TCGA-YB-A89D	0.958904	0	0.451614	0.638803	1.30915	0.218509	0.435631	3.04084	high
TCGA-FB-AAPS	0.624658	0	2.16017	1.11788	1.24144	0.518339	0.312753	3.44939	high
TCGA-2L-AAQA	0.391781	1	1.54882	1.06322	2.74866	0.780964	1.04356	2.88676	high
TCGA-HZ-8317	1.03562	1	0.0846955	0.718805	0.52517	0.158452	0.23881	2.0755	high
TCGA-FB-AAQ2	0.419178	1	1.12589	1.86431	0.642031	0.421534	0.425169	1.04599	low
TCGA-HV-AA8V	2.52055	0	0.357055	0.966455	1.08854	0.710225	0.272297	1.65473	high
TCGA-2J-AAB4	1.99726	0	0.517077	1.14375	2.1553	1.14281	0.596828	1.49793	high
TCGA-F2-A7TX	0.260274	1	0.0768317	0.966023	0.333486	0.600983	0.213786	1.17012	high
TCGA-F2-7276	0.591781	1	0.0912072	1.07509	0.702221	0.181422	0.344022	1.61483	high
TCGA-HZ-8638	0.413699	1	0.013314	1.40198	1.02782	1.17671	0.330951	0.714566	low
TCGA-HZ-7919	1.62466	1	0.477347	1.09648	1.41163	0.568516	0.769694	1.42436	high
TCGA-Z5-AAPL	1.27945	0	0.0825041	1.55601	0.639477	2.04029	0.479546	0.259359	low
TCGA-3A-A9IS	2.73425	0	0	1.18528	0.0252774	1.0651	0.272235	0.573645	low
TCGA-XD-AAUH	1.08219	0	0.124581	2.19293	0.517565	1.76813	1.42357	0.0976071	low
TCGA-HZ-8315	0.819178	1	0.573621	0.776321	0.691608	0.585919	0.407896	1.66695	high
TCGA-HZ-7922	0.0109589	0	0.417938	1.11379	1.65067	0.556823	0.687641	1.6583	high
TCGA-IB-A7LX	0.684932	1	0.901468	0.881562	0.714242	0.56217	0.929023	1.22475	high
TCGA-IB-7890	1.63836	1	1.64947	1.07153	1.75237	0.120599	1.21576	2.61874	high
TCGA-IB-7646	0.39726	1	1.91346	0.760086	1.12129	0.122085	0.577282	4.19179	high
TCGA-IB-7654	1.30411	1	0.310339	0.351176	0.66966	0.592608	0.43752	1.95665	high
TCGA-XD-AAUL	1.36438	0	0.838817	0.257934	0.791493	0.64113	0.426214	2.60938	high
TCGA-3A-A9I5	4.91507	0	0.122295	3.8441	1.31188	0.504926	1.48819	0.110959	low
TCGA-HZ-8636	1.49315	1	1.44134	1.04018	0.902849	0.986765	0.971267	1.0392	low
TCGA-US-A77E	1.17808	1	0.97742	0.542176	0.974461	0.105092	0.277303	4.07744	high
TCGA-F2-6880	0.808219	0	0	0.418563	0.0825684	0.171808	0.34202	1.8309	high
TCGA-2J-AAB9	1.71781	1	0.584868	1.06063	0.78111	0.507917	0.467359	1.45694	high
TCGA-HZ-8002	1.00274	1	0.25731	2.07593	1.08494	0.215795	1.2092	0.53546	low
TCGA-IB-7644	1.07945	1	0.310667	0.532649	1.34844	0.0774341	0.738704	2.81286	high
TCGA-XN-A8T5	1.9726	0	0.0271803	1.19611	0.632013	0.263019	1.85546	0.435078	low
TCGA-2J-AABT	0.873973	0	0.162251	0.807509	0.553338	0.505912	0.280914	1.52962	high
TCGA-2J-AABU	0.758904	1	2.26088	1.34237	0.778833	0.486179	0.782875	1.77239	high
TCGA-3A-A9IC	2.02192	1	1.46731	0.872577	1.31557	0.716337	1.35358	1.3261	high
TCGA-LB-A9Q5	0.857534	1	0.174753	0.588538	0.294117	0.0885787	0.407528	1.94865	high
TCGA-HZ-A4BH	0.531507	0	0.221178	0.834277	0.720014	0.585014	1.1324	0.839849	low
TCGA-IB-AAUU	0.671233	0	0.395306	1.2115	0.759862	0.204016	1.74525	0.592854	low
TCGA-IB-7893	0.320548	1	3.84673	0.853786	1.16986	0.568305	0.408535	6.61433	high
TCGA-2J-AABI	2.65479	0	1.07613	1.03497	0.313718	0.352297	2.69939	0.306606	low
TCGA-FB-A7DR	0.967123	1	2.18875	0.594174	0.727939	0.147619	0.996588	3.09065	high
TCGA-2J-AAB8	0.219178	0	0.349778	1.58047	0.596438	0.634637	0.583961	0.714696	low
TCGA-H6-A45N	1.08767	1	0.435248	1.71015	0.888366	0.339284	0.968871	0.727609	low
TCGA-HZ-A49H	1.34521	0	0.0224443	2.29285	1.89967	0.246147	0.299769	1.20252	high
TCGA-IB-A5SO	1	1	1.14943	0.361302	1.91418	0.572031	0.353339	5.22013	high
TCGA-IB-7645	4.11507	1	0.171356	1.07725	1.8299	0.779958	0.367315	1.82355	high
TCGA-3A-A9J0	2.03562	0	0.930132	0.67744	2.13114	0.2488	1.38033	2.56901	high
TCGA-3E-AAAY	6.26027	0	0.155245	1.25482	0.990131	0.271841	0.962686	0.998076	low
TCGA-H6-8124	1.07397	0	2.87591	1.86276	1.30772	0.905164	0.905311	1.34605	high
TCGA-IB-7889	1.31781	1	0.187735	1.28751	1.32282	0.974397	0.51288	0.96533	low
TCGA-S4-A8RP	1.92329	1	0.423292	0.939203	2.26959	0.70678	0.50808	2.59092	high
TCGA-S4-A8RM	2.01918	0	0.308261	1.3626	3.05828	1.93272	1.04359	0.748512	low
TCGA-HV-A5A3	0.350685	1	0.603403	1.05371	0.935378	0.670405	0.397982	1.48418	high
TCGA-US-A779	1.4	1	0.0223395	0.59687	3.82316	1.77984	1.43383	1.39533	high
TCGA-HZ-7926	1.41918	1	0.248609	0.629505	0.706542	0.138107	0.732755	1.80683	high
TCGA-IB-7885	3.44384	0	1.08284	0.447855	0.90997	0.14247	0.444025	3.77065	high
TCGA-HZ-A49G	1.80822	0	0.167649	1.58091	1.38852	0.548492	1.73267	0.450855	low
TCGA-2J-AABE	1.85205	0	0.858964	1.39354	1.52053	1.09039	1.16164	0.718505	low
TCGA-IB-A6UF	1.82466	0	1.78703	1.56759	1.8103	0.703774	0.840308	1.72792	high
TCGA-HZ-7923	0.860274	0	0.197026	1.54828	1.2123	0.420425	0.421715	1.23109	high
TCGA-HV-A5A6	5.57808	1	0.507617	1.78555	0.434665	0.514601	0.914735	0.519963	low
TCGA-HZ-7289	1.81096	1	0.150824	0	0.0642957	0.522984	0.678468	1.54354	high
TCGA-IB-A7M4	1.32329	0	1.01821	0.284493	0.6033	0.934212	0.318997	2.17647	high
TCGA-3A-A9IB	0.613699	1	0.577713	0.534097	0.985109	0.317886	0.340412	2.9122	high
TCGA-HV-AA8X	1.45753	1	0.0994315	1.25018	1.15294	0.186021	1.49033	0.76775	low
TCGA-3A-A9IL	7.50959	0	0.0228213	3.01285	0.191036	2.67949	0.719678	0.0391821	low
TCGA-3A-A9IV	3.02192	0	0.126189	3.41119	0.469474	1.07457	0.299626	0.156541	low
TCGA-3A-A9IZ	0.843836	1	1.4986	0.563219	1.03024	0.273219	0.954845	2.67974	high
TCGA-FB-AAQ3	0.0849315	1	0.772469	1.48384	2.82955	0.166112	1.1039	2.54789	high
TCGA-HZ-A49I	0.843836	1	0.270549	0.541175	2.30287	0.587077	0.583998	3.38475	high
TCGA-2J-AABV	1.7863	1	0.100575	0.592756	0.140317	0.689378	0.335822	1.19024	high
